# Supplementary material for: Inflammation and Venous Thromboembolism in Hospitalized Patients with COVID-19
Source: MDPI journal article supplement (doi:10.3390/diagnostics13223477), 2023-11-19
Supplement: s1 [file s1]

| Category                                       | Variables             | Description                                                                                                                                                                                                        | Values            | SI units          |
|------------------------------------------------|-----------------------|--------------------------------------------------------------------------------------------------------------------------------------------------------------------------------------------------------------------|-------------------|-------------------|
| <b>Personal Information</b>                    |                       |                                                                                                                                                                                                                    |                   |                   |
|                                                | Date of admission     | Determines patient's date of admission                                                                                                                                                                             | day/month/year    | NA                |
|                                                | Date of Discharge     | Determines patient's date of discharge                                                                                                                                                                             | day/month/year    | NA                |
|                                                | Patient Study ID      | Unique numeric code for each patient                                                                                                                                                                               | Numerical         | NA                |
|                                                | Gender                | Gender of the patient                                                                                                                                                                                              | Male<br>Female    | -                 |
|                                                | Age                   | Age of the patient at admission                                                                                                                                                                                    | Numerical<br>> 16 | years             |
|                                                | BMI                   | Body mass index of the patient                                                                                                                                                                                     | Numerical         | kg/m <sup>2</sup> |
| <b>Past medical history/<br/>Comorbidities</b> |                       |                                                                                                                                                                                                                    |                   |                   |
|                                                | CAD                   | Past cardiac medical history, type: coronary artery disease, myocardial Infraction, prior cardiac catheterization, self-reported or by patient's medication or else documented (visits at clinic, other documents) | no<br>yes         | -                 |
|                                                | Hyperlipidemia        | Past medical history of the patient, self-reported or by patient's medication or else documented (visits at clinic, other documents)                                                                               | no<br>yes         | -                 |
|                                                | Arterial Hypertension | Past medical history of the patient, self-reported or by patient's medication or else documented (visits at clinic, other documents)                                                                               | no<br>yes         | -                 |
|                                                | Diabetes mellitus     | Past medical history of the patient, self-reported or by patient's medication or else documented (visits at clinic, other documents)                                                                               | no<br>yes         | -                 |
|                                                | Cancer                | Past medical history of the patient of known cancer, self-reported or by medication patient was receiving, or else documented (visits at clinic, other documents)                                                  | no<br>yes         | -                 |
|                                                | Autoimmune disease    | Past medical history of the patient of autoimmune disease, self-reported of by medication patient was receiving (visits at clinic, other documents)                                                                | no<br>yes         | -                 |
|                                                | Pulmonary disease     | Past medical history of the patient of chronic pulmonary                                                                                                                                                           | no<br>yes         | -                 |

|                              |                              |                                                                                                                                                          |                |                   |
|------------------------------|------------------------------|----------------------------------------------------------------------------------------------------------------------------------------------------------|----------------|-------------------|
|                              |                              | disease                                                                                                                                                  |                |                   |
|                              | CKD                          | Chronic kidney disease, a type of renal medical history, self-reported or by patient's medication or else documented (visits at clinic, other documents) | no<br>yes      | -                 |
|                              | Thyroid disease              | Thyroid disease, a type of endocrine medical history self-reported or by patient's medication or else documented (visits at clinic, other documents)     | no<br>yes      | -                 |
|                              | Morbid Obesity (categorical) | Defined by BMI values                                                                                                                                    | < 35<br>> 35   | Kg/m <sup>2</sup> |
|                              |                              |                                                                                                                                                          | no<br>yes      |                   |
|                              | Dementia                     | Medical history of dementia                                                                                                                              | no<br>yes      | -                 |
|                              | Smoking                      | Current smoker                                                                                                                                           | no<br>yes      | -                 |
| <b>Hospital Summary</b>      |                              |                                                                                                                                                          |                |                   |
|                              | CTBoD                        | Burden of disease in Computed Tomography as affected lung parenchyma                                                                                     | Numerical      | %                 |
|                              | CTBoD (categorical)          | Burden of disease in Computed Tomography as affected lung parenchyma                                                                                     | > 50<br>< 50   | %                 |
|                              | Duration of symptoms         | Days of reported symptoms prior to hospitalization                                                                                                       | Numerical      | days              |
|                              | Days of hospitalization      | Hospital LoS: days to discharge or death                                                                                                                 | Numerical      | days              |
|                              | Days to death                | Days to death                                                                                                                                            | Numerical      | days              |
|                              | FiO2                         | Fraction of inspired O2                                                                                                                                  | Numerical      | %                 |
|                              | pO2                          | Partial pressure of O2                                                                                                                                   | Numerical      | mmHg              |
|                              | PFR                          | PO <sub>2</sub> /FiO <sub>2</sub> ratio on admission                                                                                                     | Numerical      | -                 |
|                              | PFR-150                      | PO <sub>2</sub> /FiO <sub>2</sub> ratio on admission                                                                                                     | < 150<br>> 150 | -                 |
|                              | PFR-300                      | PO <sub>2</sub> /FiO <sub>2</sub> ratio on admission                                                                                                     | < 300<br>> 300 | -                 |
| <b>Laboratory parameters</b> |                              |                                                                                                                                                          |                |                   |
|                              | aPTT                         | Activated Partial Thromboplastin Time                                                                                                                    | Numerical      | sec               |
|                              | CRP                          | C-reactive protein serum concentration                                                                                                                   | Numerical      | mg/L              |
|                              | CRP (categorical)            | C-reactive protein serum concentration                                                                                                                   | < 100<br>> 100 | mg/L              |
|                              | CRP/HDL-C                    | CRP/HDL-C ratio                                                                                                                                          | Numerical      | -                 |
|                              | D-dimers                     | D-dimer plasma concentration                                                                                                                             | Numerical      | µg/mL             |
|                              | D-dimers (categorical)       | D-dimer plasma concentration                                                                                                                             | < 2<br>> 2     | µg/mL             |

|                 |                                 |                                                                              |                         |       |
|-----------------|---------------------------------|------------------------------------------------------------------------------|-------------------------|-------|
|                 | Ferritin                        | Ferritin serum concentration                                                 | Numerical               | ng/mL |
|                 | Ferritin (categorical)          | Ferritin serum concentration                                                 | < 335<br>> 335          | ng/mL |
|                 | Fibrinogen                      | fibrinogen                                                                   | Numerical               | mg/dL |
|                 | Fibrinogen (categorical)        | fibrinogen                                                                   | > 600<br>< 600          | mg/dL |
|                 | HDL-C                           | serum HDL-Cholesterol                                                        | Numerical               | mg/dL |
|                 | IL-6                            | Interleukin 6 serum concentration                                            | Numerical               | pg/mL |
|                 | IL-6 (categorical)              | Interleukin 6 serum concentration                                            | < 24<br>> 24            | pg/mL |
|                 | LDH                             | Lactate dehydrogenase serum concentration                                    | Numerical               | IU/L  |
|                 | LDH (Categorical)               | Lactate dehydrogenase serum concentration                                    | < 230<br>> 230          | IU/L  |
|                 | LDL-C                           | serum LDL-Cholesterol                                                        | Numerical               | mg/dL |
|                 | Leukocytosis                    | Leukocytes count                                                             | > 11,000                | #/μL  |
|                 | Lymphopenia (categorical)       | Lymphocytes count                                                            | < 1,000                 | #/μL  |
|                 | Lymph/HDL-C                     | Lymph/HDL-C ratio                                                            | Numerical               | -     |
|                 | Neut/HDL-C                      | Neut/HDL-C ratio                                                             | Numerical               | -     |
|                 | Neut/Lymph ratio                | Neutrophils to Lymphocytes ratio of the patient                              | Numerical               | -     |
|                 | Neutr/Lymph ratio (Categorical) | Neutrophils to Lymphocytes ratio of the patient, categorical                 | < 3.1<br>> 3.1          | -     |
|                 | Neutrophis                      | White blood cell count of the patient, absolute count                        | Numerical               | #/μL  |
|                 | Platelet Count                  | Platelet count of the patient                                                | Numerical               | #/μL  |
|                 | Procalcitonin                   | Procalcitonin serum concentration                                            | Numerical               | ng/mL |
|                 | Procalcitonin (categorical)     | Procalcitonin serum concentration                                            | < 0.5<br>> 0.5          | ng/mL |
|                 | T-C                             | serum Total Cholesterol                                                      | Numerical               | mg/dL |
|                 | Thrombocytopenia (categorical)  | Platelets count                                                              | < 150000                | #/μL  |
|                 | TRG                             | serum Triglycerides                                                          | Numerical               | mg/dL |
|                 | TRG/HDL-C                       | TRG/HDL-C ratio                                                              | Numerical               | -     |
|                 | TRG/HDL-C (categorical)         | TRG/HDL-C ratio                                                              | < 2.5<br>> 2.5          | -     |
|                 | TyG                             | TyG index                                                                    | Numerical               | -     |
|                 | TyG 1 (categorical)             | TyG index                                                                    | < 8.7<br>>8.7 and < 9.1 | -     |
|                 | TyG 2 (categorical)             | TyG index                                                                    | < 9.1<br>> 9.1          | -     |
|                 | TyG 3 (categorical)             | TyG index                                                                    | < 8.7<br>> 9.1          | -     |
| <b>Outcomes</b> |                                 |                                                                              |                         |       |
|                 | VTE                             | Venous thromboembolism was considered the radiographic evidence of pulmonary | no<br>yes               | -     |

|  |                                                    |                                                                        |            |      |
|--|----------------------------------------------------|------------------------------------------------------------------------|------------|------|
|  |                                                    | embolism and vascular tree-in-bud                                      |            |      |
|  | LoS<br>(categorical)                               | Hospital length of stay: days to discharge or death                    | < 7<br>> 7 | days |
|  | Intubation/Mechanical ventilation<br>(categorical) | Need for invasive mechanical ventilation during hospitalization        | no<br>yes  | -    |
|  | Death<br>(categorical)                             | Patient death during hospitalization, general COVID-19 ward and/or ICU | no<br>yes  | -    |

**Table S1. Definitions and Dictionary of variables in study's registry database.**
